# Supplementary material for: Glucocorticoid injections for greater trochanteric pain syndrome: a randomised double-blind placebo-controlled (GLUTEAL) trial
Source: Springer Nature journal article supplement (doi:10.1007/s10067-018-4309-6), 2018-09-28
Supplement: MOESM4 [file 16160350]

Supplementary file 4: Detailed description of the serious adverse events.

| Patient number | Date | Type of SAE | Cause | Outcome | Number of GC injections received | Time (days) between GC injection and SAE |
| --- | --- | --- | --- | --- | --- | --- |
| 7 | 23.11.2012 | Hospitalisation | Traumatic back pain | Surgery | 1 | 94 |
| 9 | 09.01.2013 | Hospitalisation | Syncope and Diarrhoea | Resolution | 1 | 65 |
| 12 | 22.01.2013 | Hospitalisation | Sciatica | Resolved with treatment | 2 | 20 |
| 12 | 19.02.2013 | Hospitalisation | Cardiac failure | Resolved with treatment | 2 | 48 |
| 12 | 05.03.2013 | Hospitalisation | Cardiac failure | Resolved with treatment | 2 | 62 |
| 12 | 14.05.2013 | Hospitalisation | Skin infection, hepatitis | Resolved with treatment | 2 | 132 |
| 18 | 16.04.2013 | Hospitalisation | Fall complicated by spinal cord injury | Progressive recovery | 2 | 12 |
| 18 | 30.09.2013 | Hospitalisation | Urinary insufficiency | Persistent | 2 | 180 |
| 28 | 08.05.2014 | Hospitalisation | Headache and brief loss of consciousness due to basilar migraine | Resolved with treatment | 1 | 120 |
| 46 | 23.06.2015 | Miscarriage | Pregnancy | Subsequent successful pregnancy | 0 | 29* |

SAE = serious adverse event. GC = glucocorticoid.

* Number of days after the Placebo injection (as this patient did not receive a GC injection).
